# Supplementary material for: Novel methodology for the digital analysis of circulating tumor cells in ovarian cancer
Source: Research Square preprint supplement (doi:10.21203/rs.3.rs-8106577/v1), 2025-12-01
Supplement: Supplementary file 1 [file 12854bd20625825555f03f5b.xlsx]

## Sheet: SI 1
gene_id_cut	symbol	name	locus_type	gene_group	gene_group_id	Disease.involvement	RNA.cancer.specificity	RNA.cancer.specific.FPKM
ENSG00000188157	AGRN	agrin	gene with protein product	Proteoglycans	570	Congenital myasthenic syndrome, Disease variant	Low cancer specificity
ENSG00000130707	ASS1	argininosuccinate synthase 1	gene with protein product			Disease variant	Low cancer specificity
ENSG00000187244	BCAM	basal cell adhesion molecule (Lutheran blood group)	gene with protein product	Blood group antigens|CD molecules|C2-set domain containing|Ig-like cell adhesion molecule family	454|471|592|1410		Cancer enhanced	ovarian cancer: 493.9
ENSG00000123095	BHLHE41	basic helix-loop-helix family member e41	gene with protein product	Basic helix-loop-helix proteins	420		Cancer enhanced	thyroid cancer: 78.4
ENSG00000039068	CDH1	cadherin 1	gene with protein product	CD molecules|Type I classical cadherins	471|1185	Cancer-related genes, Disease variant, Ectodermal dysplasia	Low cancer specificity
ENSG00000147889	CDKN2A	cyclin dependent kinase inhibitor 2A	gene with protein product			Cancer-related genes, Disease variant, Li-Fraumeni syndrome, Tumor suppressor	Cancer enhanced	cervical cancer: 49.9;ovarian cancer: 57.6
ENSG00000165215	CLDN3	claudin 3	gene with protein product	Claudins	488	Cancer-related genes, Williams-Beuren syndrome	Cancer enhanced	ovarian cancer: 529.2
ENSG00000189143	CLDN4	claudin 4	gene with protein product	Claudins	488	Cancer-related genes, Williams-Beuren syndrome	Low cancer specificity
ENSG00000047457	CP	ceruloplasmin	gene with protein product			Cancer-related genes	Cancer enhanced	liver cancer: 98.3
ENSG00000143320	CRABP2	cellular retinoic acid binding protein 2	gene with protein product	Fatty acid binding protein family	550		Low cancer specificity
ENSG00000096696	DSP	desmoplakin	gene with protein product	Plakins	939	Cardiomyopathy, Disease variant, Epidermolysis bullosa, Palmoplantar keratoderma	Cancer enhanced	head and neck cancer: 314.1
ENSG00000135373	EHF	ETS homologous factor	gene with protein product	ETS transcription factor family	534		Low cancer specificity
ENSG00000163435	ELF3	E74 like ETS transcription factor 3	gene with protein product	ETS transcription factor family	534	Cancer-related genes	Low cancer specificity
ENSG00000119888	EPCAM	epithelial cell adhesion molecule	gene with protein product	CD molecules|MicroRNA protein coding host genes	471|1691	Cancer-related genes, Disease variant, FDA approved drug targets, Hereditary nonpolyposis colorectal cancer	Low cancer specificity
ENSG00000104413	ESRP1	epithelial splicing regulatory protein 1	gene with protein product	RNA binding motif containing	725	Deafness, Disease variant, Non-syndromic deafness	Low cancer specificity
ENSG00000110195	FOLR1	folate receptor alpha	gene with protein product			Neurodegeneration	Cancer enhanced	ovarian cancer: 259.5
ENSG00000169035	KLK7	kallikrein related peptidase 7	gene with protein product	Kallikreins|Serine proteases	616|738	Cancer-related genes	Cancer enhanced	ovarian cancer: 139.8
ENSG00000135480	KRT7	keratin 7	gene with protein product	Keratins, type II	609		Cancer enhanced	urothelial cancer: 560.1
ENSG00000170421	KRT8	keratin 8	gene with protein product	Keratins, type II	609	Cancer-related genes, Disease variant	Low cancer specificity
ENSG00000111057	KRT18	keratin 18	gene with protein product	Keratins, type I	608	Cancer-related genes, Disease variant	Low cancer specificity
ENSG00000171345	KRT19	keratin 19	gene with protein product	Keratins, type I	608	Cancer-related genes	Low cancer specificity
ENSG00000104341	LAPTM4B	lysosomal protein transmembrane 4 beta	gene with protein product				Low cancer specificity
ENSG00000147676	MAL2	mal, T cell differentiation protein 2	gene with protein product	MARVEL domain containing	1626		Low cancer specificity
ENSG00000102854	MSLN	mesothelin	gene with protein product			Cancer-related genes	Cancer enhanced	ovarian cancer: 343.4
ENSG00000210196	MT-TP	mitochondrially encoded tRNA-Pro (CCN)	RNA, transfer	Mitochondrially encoded transfer RNAs	843
ENSG00000185499	MUC1	mucin 1, cell surface associated	gene with protein product	CD molecules|Mucins	471|648	Cancer-related genes, Tumor suppressor	Low cancer specificity
ENSG00000181143	MUC16	mucin 16, cell surface associated	gene with protein product	Mucins	648		Cancer enriched	ovarian cancer: 21.9
ENSG00000169418	NPR1	natriuretic peptide receptor 1	gene with protein product	Transmembrane guanylate cyclases	343	FDA approved drug targets	Group enriched	ovarian cancer: 39.2;renal cancer: 12.8
ENSG00000125618	PAX8	paired box 8	gene with protein product	PRD class homeoboxes and pseudogenes|Paired boxes	521|675	Cancer-related genes, Congenital hypothyroidism, Disease variant	Group enriched	endometrial cancer: 60.6;ovarian cancer: 63.5;renal cancer: 33.2;thyroid cancer: 122.2
ENSG00000111319	SCNN1A	sodium channel epithelial 1 subunit alpha	gene with protein product	Sodium channels epithelial	185	Disease variant, FDA approved drug targets	Low cancer specificity
ENSG00000157765	SLC34A2	solute carrier family 34 member 2	gene with protein product	Solute carriers	752	Cancer-related genes, Disease variant	Group enriched	lung cancer: 252.6;ovarian cancer: 191.7;thyroid cancer: 585.2
ENSG00000164736	SOX17	SRY-box transcription factor 17	gene with protein product	SRY-box transcription factors	757	Cancer-related genes, Disease variant	Group enriched	endometrial cancer: 122.8;ovarian cancer: 96.2
ENSG00000262655	SPON1	spondin 1	gene with protein product				Cancer enriched	ovarian cancer: 199.1
ENSG00000101443	WFDC2	WAP four-disulfide core domain 2	gene with protein product	WAP four-disulfide core domain containing	361	Cancer-related genes	Group enriched	endometrial cancer: 1815.6;ovarian cancer: 1086.5
ENSG00000184937	WT1	WT1 transcription factor	gene with protein product	Zinc fingers C2H2-type	28	Cancer-related genes, Disease variant, Tumor suppressor	Cancer enriched	ovarian cancer: 55.2
ENSG00000165655	ZNF503	zinc finger protein 503	gene with protein product	Zinc fingers C2H2-type	28		Cancer enhanced	ovarian cancer: 62.9
Supplementary Information 1 The 36 candidate genes were identified and selected during the in silico analysis for ovarian cancer–specific markers using publicly available expression databases (TCGA and GTEx).
