# Supplementary material for: Novel methodology for the digital analysis of circulating tumor cells in ovarian cancer
Source: Research Square preprint supplement (doi:10.21203/rs.3.rs-8106577/v1), 2025-12-01
Supplement: Supplementary file 2 [file 39cd2d71ab1517b748bf7b12.docx]

**TITLE**

**Novel methodology for the digital analysis of circulating tumor cells in ovarian cancer**

*Abigél Mészáros1,2, Dávid Kis1, Péter Hunyadi1, Szabolcs Máté3, Ágnes Égető3, Szilárd Tóth4, Ines Lidia Haffaressas4,5, András Füredi4,6, Csaba Bödör7, András Rókusz7, János Rigó Jr.3,8, Orsolya Biró1,2*

*1 Clinomics Europe Ltd, Budapest, Hungary*

*2 Semmelweis University, Doctoral School, Department of Operative Medicine, Budapest, Hungary*

*3 Semmelweis University, Faculty of Medicine, Department of Obstetrics and Gynaecology, Budapest, Hungary*

*4 Drug Resistance Research Group, Institute of Enzymology, HUN-REN Research Centre for Natural Sciences, Budapest, Hungary*

*5 Doctoral School of Biology, Institute of Biology, ELTE Eötvös Loránd University, 1117 Budapest Pázmány Péter sétány 1/C, Hungary*

*6 Microsystems Laboratory, Institute of Technical Physics and Materials Science, HUN-REN Centre for Energy Research, Budapest, Hungary*

*7 Semmelweis University,**Faculty of Medicine, Department of Pathology and Experimental Cancer Research*

*8 Semmelweis University, Faculty of Health Sciences, Department of Clinical Studies in Obstetrics and Gynaecology, Budapest, Hungary*

Corresponding author:

Abigél Mészáros: balla.abigel@phd.semmelweis.hu

ORCID ID: 0009-0007-1738-0918

|  | **Markers** | ***in silico*** | ***in vitro*** | ***in vivo*** |
| --- | --- | --- | --- | --- |
| 1 | **EPCAM** | yes | yes | yes |
| 2 | **FOLR1** | yes | yes | yes |
| 3 | **PPIC** | no | yes | yes |
| 4 | **SLC34A2** | yes | yes | yes |
| 5 | **WFDC2** | yes | yes | yes |
| 6 | **KLK5** | no | yes | no |
| 7 | **KLK6** | no | yes | no |
| 8 | **MUC16** | yes | yes | no |
| 9 | **MUC4** | no | yes | no |
| 10 | **PRAME** | no | yes | no |
| 11 | **SOX17** | yes | yes | no |
| 12 | **TUSC3** | no | yes | no |
| 13 | BCAM | yes | no | no |
| 14 | CLDN3 | yes | no | no |
| 15 | ERCC1 | no | no | no |
| 16 | KRT19 | yes | no | no |
| 17 | KRT7 | yes | no | no |
| 18 | MAL2 | yes | no | no |
| 19 | MUC1 | yes | no | no |
| 20 | PRSS8 | no | no | no |
| 21 | SPON1 | yes | no | no |
|  |  |  |  |  |

**Supplementary Information 3** Markers identified through the in silico analysis and literature review were further evaluated by RT-qPCR in ovarian cancer cell lines, healthy donor–derived WBCs, and CD-Prime FAST-Auto disc–captured cells. Nine genes exhibited detectable expression in WBCs, indicating high background levels, and were excluded from further analyses. The remaining 12 genes (*EPCAM, PPIC, FOLR1, WFDC2, SLC34A2, KLK5, KLK6, MUC16, MUC4, PRAME, SOX17,* and *TUSC3*), which were not expressed in WBCs, were identified as suitable ovarian cancer–specific markers for digital PCR and subsequently evaluated in clinical samples.
