# Supplementary material for: Novel methodology for the digital analysis of circulating tumor cells in ovarian cancer
Source: Research Square preprint supplement (doi:10.21203/rs.3.rs-8106577/v1), 2025-12-01
Supplement: Supplementary file 3 [file 53abb04eb79b2b3b2fdda373.docx]

**TITLE**

**Novel methodology for the digital analysis of circulating tumor cells in ovarian cancer**

*Abigél Mészáros1,2, Dávid Kis1, Péter Hunyadi1, Szabolcs Máté3, Ágnes Égető3, Szilárd Tóth4, Ines Lidia Haffaressas4,5, András Füredi4,6, Csaba Bödör7, András Rókusz7, János Rigó Jr.3,8, Orsolya Biró1,2*

*1 Clinomics Europe Ltd, Budapest, Hungary*

*2 Semmelweis University, Doctoral School, Department of Operative Medicine, Budapest, Hungary*

*3 Semmelweis University, Faculty of Medicine, Department of Obstetrics and Gynaecology, Budapest, Hungary*

*4 Drug Resistance Research Group, Institute of Enzymology, HUN-REN Research Centre for Natural Sciences, Budapest, Hungary*

*5 Doctoral School of Biology, Institute of Biology, ELTE Eötvös Loránd University, 1117 Budapest Pázmány Péter sétány 1/C, Hungary*

*6 Microsystems Laboratory, Institute of Technical Physics and Materials Science, HUN-REN Centre for Energy Research, Budapest, Hungary*

*7 Semmelweis University,**Faculty of Medicine, Department of Pathology and Experimental Cancer Research*

*8 Semmelweis University, Faculty of Health Sciences, Department of Clinical Studies in Obstetrics and Gynaecology, Budapest, Hungary*

Corresponding author:

Abigél Mészáros: balla.abigel@phd.semmelweis.hu

ORCID ID: 0009-0007-1738-0918

| **Cell line** | **EPCAM (nTPM)** | **FOLR1 (nTPM)** | **WFDC2 (nTPM)** | **SLC34A2 (nTPM)** | **PPIC (nTPM)** |
| --- | --- | --- | --- | --- | --- |
| **59M** | 3,20 | 1,70 | 1,80 | 0,10 | 43,10 |
| **CAOV3** | 468,90 | 38,90 | 316,00 | 0,50 | 44,00 |
| **CAOV4** | 338,50 | 39,10 | 1 244,80 | 150,50 | 142,30 |
| **COV318** | 67,00 | 1,70 | 223,90 | 16,90 | 97,50 |
| **COV362** | 43,60 | 8,50 | 75,80 | 15,10 | 15,30 |
| **KURAMOCHI** | 42,20 | 12,70 | 881,30 | 99,90 | 33,50 |
| **OAW28** | 1 233,80 | 133,60 | 1 055,10 | 180,50 | 32,90 |
| **OV90** | 870,00 | 102,00 | 1,00 | 2,00 | 71,60 |
| **OVSAHO** | 179,40 | 886,20 | 5 177,90 | 113,60 | 78,60 |
| **PEO1** | 349,40 | 0 | 84,80 | 0,30 | 9,20 |
| **OVCAR3** | 276,00 | 22,80 | 779,30 | 594,10 | 75,60 |
| **OVCAR4** | 421,00 | 61,30 | 366,10 | 362,30 | 157,90 |
| **OVCAR5** | 651,30 | 23,90 | 1 428,60 | 1,20 | 77,50 |
| **OVCAR8** | 16,80 | 13,50 | 3,60 | 0 | 25,80 |
| **FUOV1** | 63,60 | 20,90 | 182,60 | 6,80 | 55,40 |
| **JHOS2** | 304,20 | 486,80 | 349,30 | 5,90 | 134,20 |
| **JHOS4** | 422,20 | 236,30 | 517,00 | 236,60 | 57,50 |
| **SNU119** | 601,00 | 51,10 | 214,30 | 418,50 | 92,50 |
| **TYKNU** | 0,50 | 0,1 | 0,3 | 0 | 57,60 |
| **ONCODG1** | 308,30 | 76,40 | 978,60 | 486,20 | 80,10 |
| **OVKATE** | 322,30 | 836,70 | 854,00 | 414,70 | 79,70 |

**Supplementary Information 6** Gene expression analysis of the 4-marker panel in HGSOC cell lines. HGSOC cell lines were selected based on the article by Mei et al. (2021) and the available RNA expression data of the selected genes in the Human Protein Atlas. Low to moderate expression (10–100 nTPM) was indicated in light green, while high expression (≥100 nTPM) was indicated in dark green. nTPM = normalised transcripts per million.
