# Supplementary material for: Novel methodology for the digital analysis of circulating tumor cells in ovarian cancer
Source: Research Square preprint supplement (doi:10.21203/rs.3.rs-8106577/v1), 2025-12-01
Supplement: Supplementary file 4 [file 86f051292ae91b2be9125527.docx]

**TITLE**

**Novel methodology for the digital analysis of circulating tumor cells in ovarian cancer**

*Abigél Mészáros1,2, Dávid Kis1, Péter Hunyadi1, Szabolcs Máté3, Ágnes Égető3, Szilárd Tóth4, Ines Lidia Haffaressas4,5, András Füredi4,6, Csaba Bödör7, András Rókusz7, János Rigó Jr.3,8, Orsolya Biró1,2*

*1 Clinomics Europe Ltd, Budapest, Hungary*

*2 Semmelweis University, Doctoral School, Department of Operative Medicine, Budapest, Hungary*

*3 Semmelweis University, Faculty of Medicine, Department of Obstetrics and Gynaecology, Budapest, Hungary*

*4 Drug Resistance Research Group, Institute of Enzymology, HUN-REN Research Centre for Natural Sciences, Budapest, Hungary*

*5 Doctoral School of Biology, Institute of Biology, ELTE Eötvös Loránd University, 1117 Budapest Pázmány Péter sétány 1/C, Hungary*

*6 Microsystems Laboratory, Institute of Technical Physics and Materials Science, HUN-REN Centre for Energy Research, Budapest, Hungary*

*7 Semmelweis University,**Faculty of Medicine, Department of Pathology and Experimental Cancer Research*

*8 Semmelweis University, Faculty of Health Sciences, Department of Clinical Studies in Obstetrics and Gynaecology, Budapest, Hungary*

Corresponding author:

Abigél Mészáros: balla.abigel@phd.semmelweis.hu

ORCID ID: 0009-0007-1738-0918

|  | **Patient ID** | **Age** | **Histological subtype** | **FIGO stage** | **TNM classification** | **CA125 level at diagnosis (U/mL)** |
| --- | --- | --- | --- | --- | --- | --- |
|  |
| 1 | S1OC-2_1 | 62,03 | HGSOC | IIIC | ypT3cN1a | 1159,3 |  |
| 2 | S1OC-9_1 | 42,81 | HGSOC | IIIB | pT3bN1b | NA |  |
| 3 | S1OC-14_1 | 65,7 | HGSOC | IIIB | ypT3b | 1199,5 |  |
| 4 | S1OC-24_1 | 52,97 | HGSOC | IIIB | pT3b | 6935,4 |  |
| 5 | S1OC-26_1 | 44,16 | HGSOC | IVB | ypT3cM1b | 66,8 |  |
| 6 | S1OC-28_1 | 63,16 | HGSOC | IIIB | ypT3bN1a | 4692,8 |  |
| 7 | S1OC-32_1 | 62,67 | HGSOC | IVB | pT1bM1b | 6309,9 |  |
| 8 | S1OC-33_1 | 82,23 | HGSOC | IIIA1 | ypT2bN1a | 51,1 |  |
| 9 | S1OC-36_1 | 67,66 | HGSOC | IIIC | ypT3c | 4013,3 |  |
| 10 | S1OC-38_1 | 72,99 | HGSOC | IIIC | pT3cN1a | 355 |  |
| 11 | S1OC-42_1 | 51,91 | HGSOC | IIIC | pT3c | 575,7 |  |
| 12 | S1OC-49_1 | 54,12 | HGSOC | IIIC | pT3c | NA |  |
| 13 | S1OC-50_1 | 72,1 | HGSOC | NA | NA | 218,3 |  |
| 14 | S1OC-53_1 | 63,31 | HGSOC | IB | pT1b | 467,7 |  |
| 15 | S1OC-56_1 | 48,28 | HGSOC | IIIA2 | ypT3a | NA |  |
| 16 | S1OC-61_1 | 67,48 | HGSOC | IVB | ypT3cN1aM1b | 203,4 |  |
| 17 | S1OC-68_1 | 71,59 | HGSOC | IIIC | pT3c | 2707,5 |  |
| 18 | S1OC-76_1 | 55,68 | HGSOC | IIIB | ypT3b | 2193,3 |  |
| 19 | S1OC-77_1 | 41 | HGSOC | IIIC | ypT3c | 595,1 |  |
| 20 | S1OC-80_1 | 58,61 | HGSOC | IIIB | ypT3b | 476,4 |  |
| 21 | S1OC-81_1 | 53,55 | HGSOC | IIIB | pT3b | 1162,8 |  |
| 22 | S1OC-87_1 | 76,72 | HGSOC | IIIC | ypT3cN1a | 561,1 |  |
| 23 | S1OC-96_1 | 60,45 | HGSOC | IIIC | pT3c | NA |  |

**Supplementary Information 5** Clinicopathological characteristics of 23 HGSOC patients from the training set, including patient ID, age, histological subtype, FIGO stage, TNM classification, and CA125 level. NA: Not available.
