# Supplementary material for: Novel methodology for the digital analysis of circulating tumor cells in ovarian cancer
Source: Research Square preprint supplement (doi:10.21203/rs.3.rs-8106577/v1), 2025-12-01
Supplement: Supplementary file 5 [file b7e2aedf2e28281d192e7ecd.docx]

**Development of a novel methodology for the digital analysis of circulating tumor cells in ovarian cancer**

*Abigél Mészáros1,2, Dávid Kis1, Péter Hunyadi1, Szabolcs Máté3, Ágnes Égető3, Szilárd Tóth4, Lidia Ines Haffaressas4, András Füredi4,5, Csaba Bödör6, András Rókusz6, János Rigó Jr.7, Orsolya Biró1,2*

*1 Clinomics Europe Kft, Budapest, Hungary,*

*2 Semmelweis University, Doctoral School, Department of Operative Medicine, Budapest, Hungary,*

*3 Semmelweis University, Department of Obstetrics and Gynaecology, Baross Utca, Budapest, Hungary,*

*4 Drug Resistance Research Group, Institute of Enzymology, HUN-REN Research Centre for Natural Sciences, Budapest, Hungary*

*5 Microsystems Laboratory, Institute of Technical Physics and Materials Science, HUN-REN Centre for Energy Research, Budapest, Hungary*

*6 Semmelweis University,**Department of Pathology and Experimental Cancer Research*

*7 Semmelweis University, Faculty of Health Sciences, Department of Obstetrics and Gynaecology, Budapest, Hungary*

Corresponding author:

Abigél Mészáros: [balla.abigel@phd.semmelweis.hu](mailto:balla.abigel@phd.semmelweis.hu)

ORCID ID: 0009-0007-1738-0918


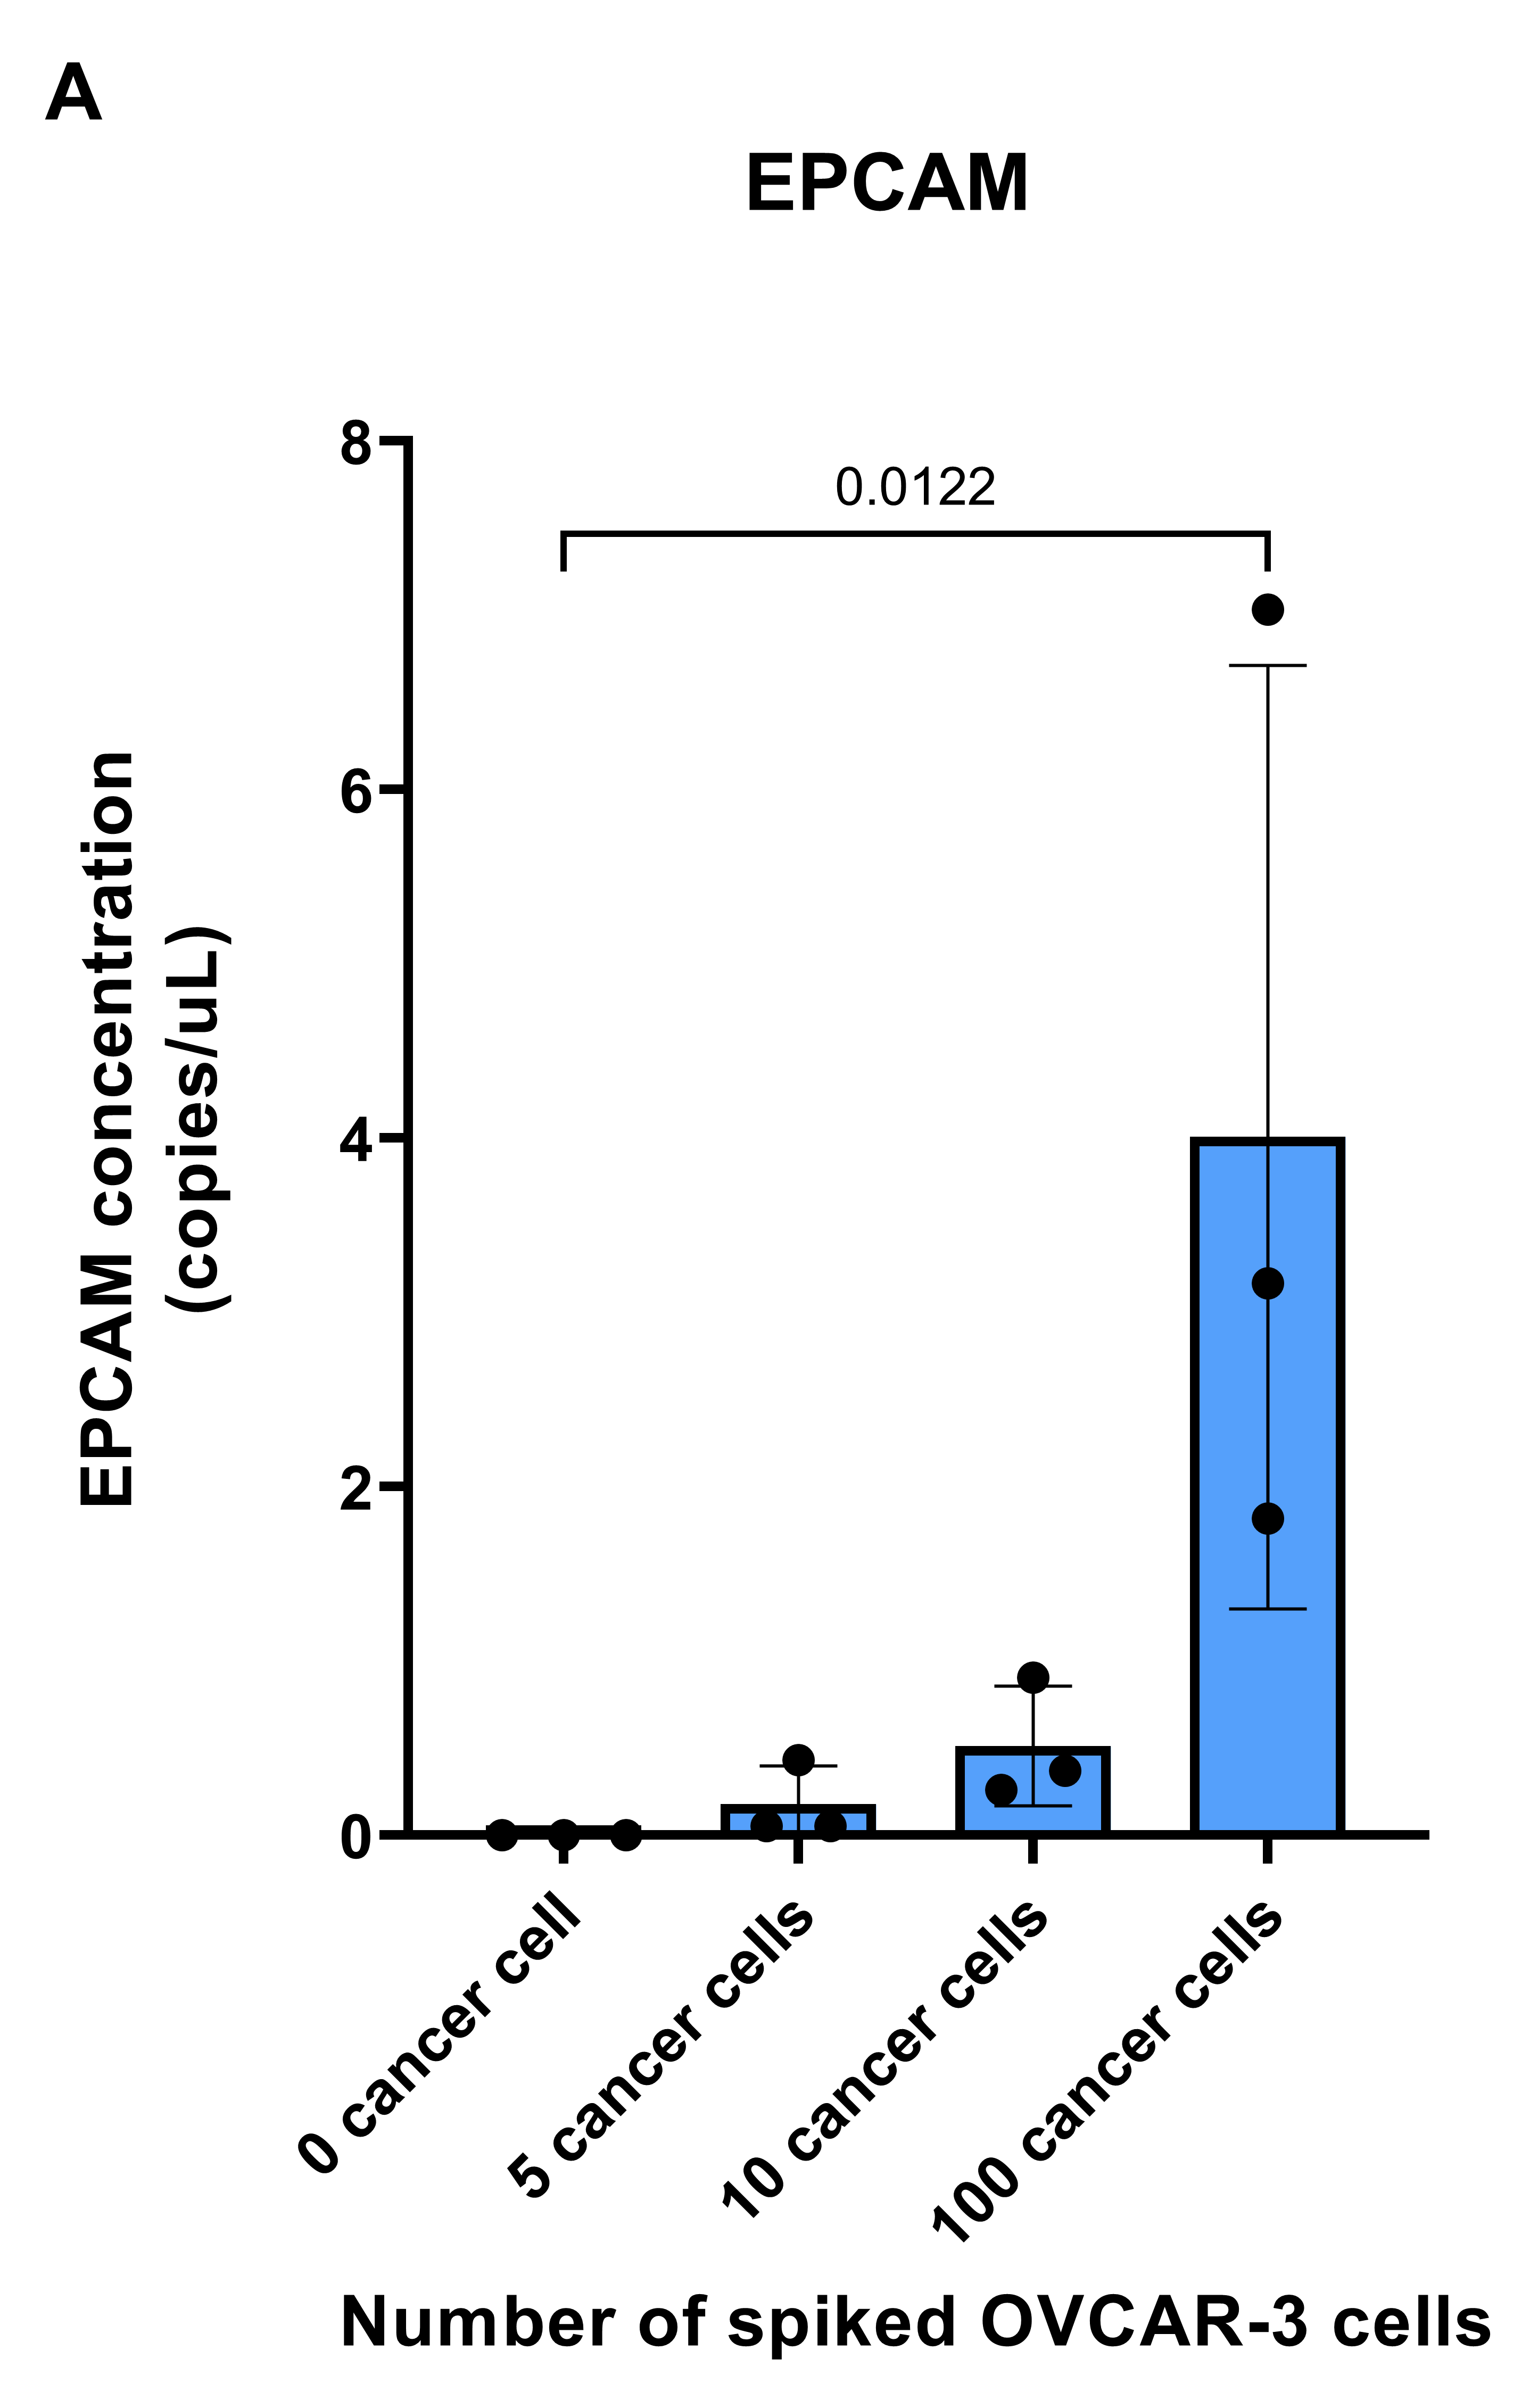

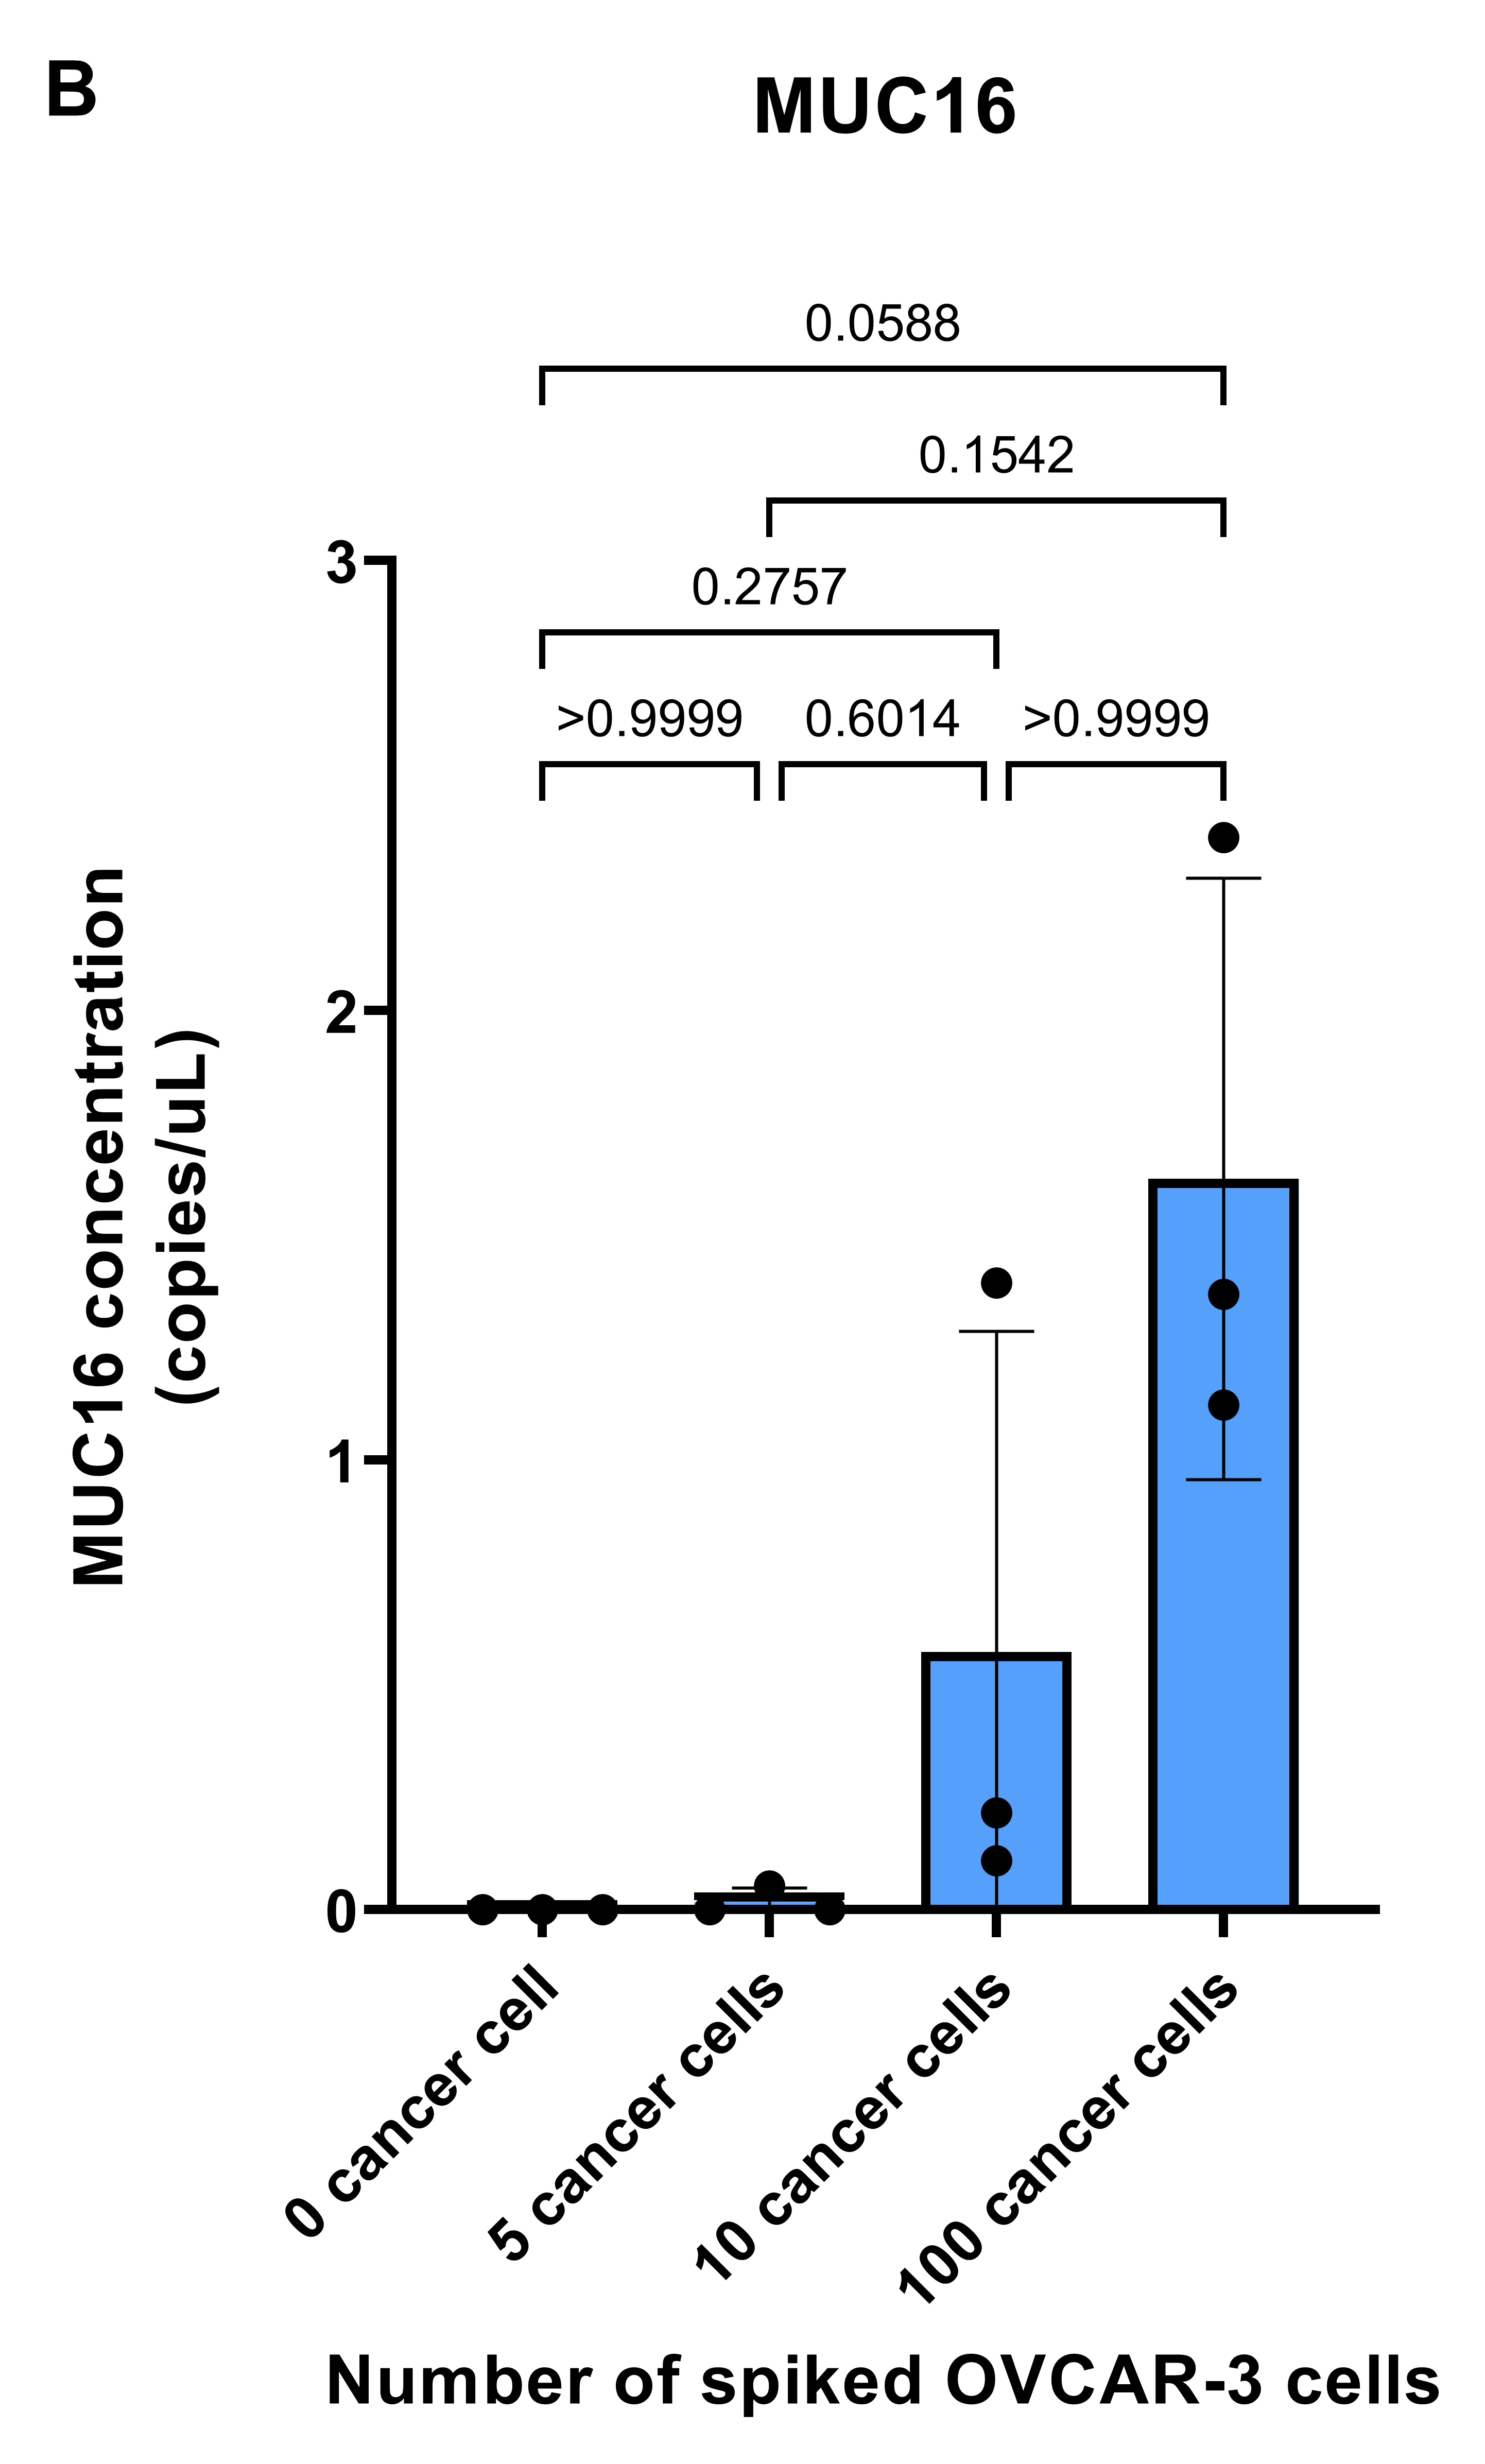


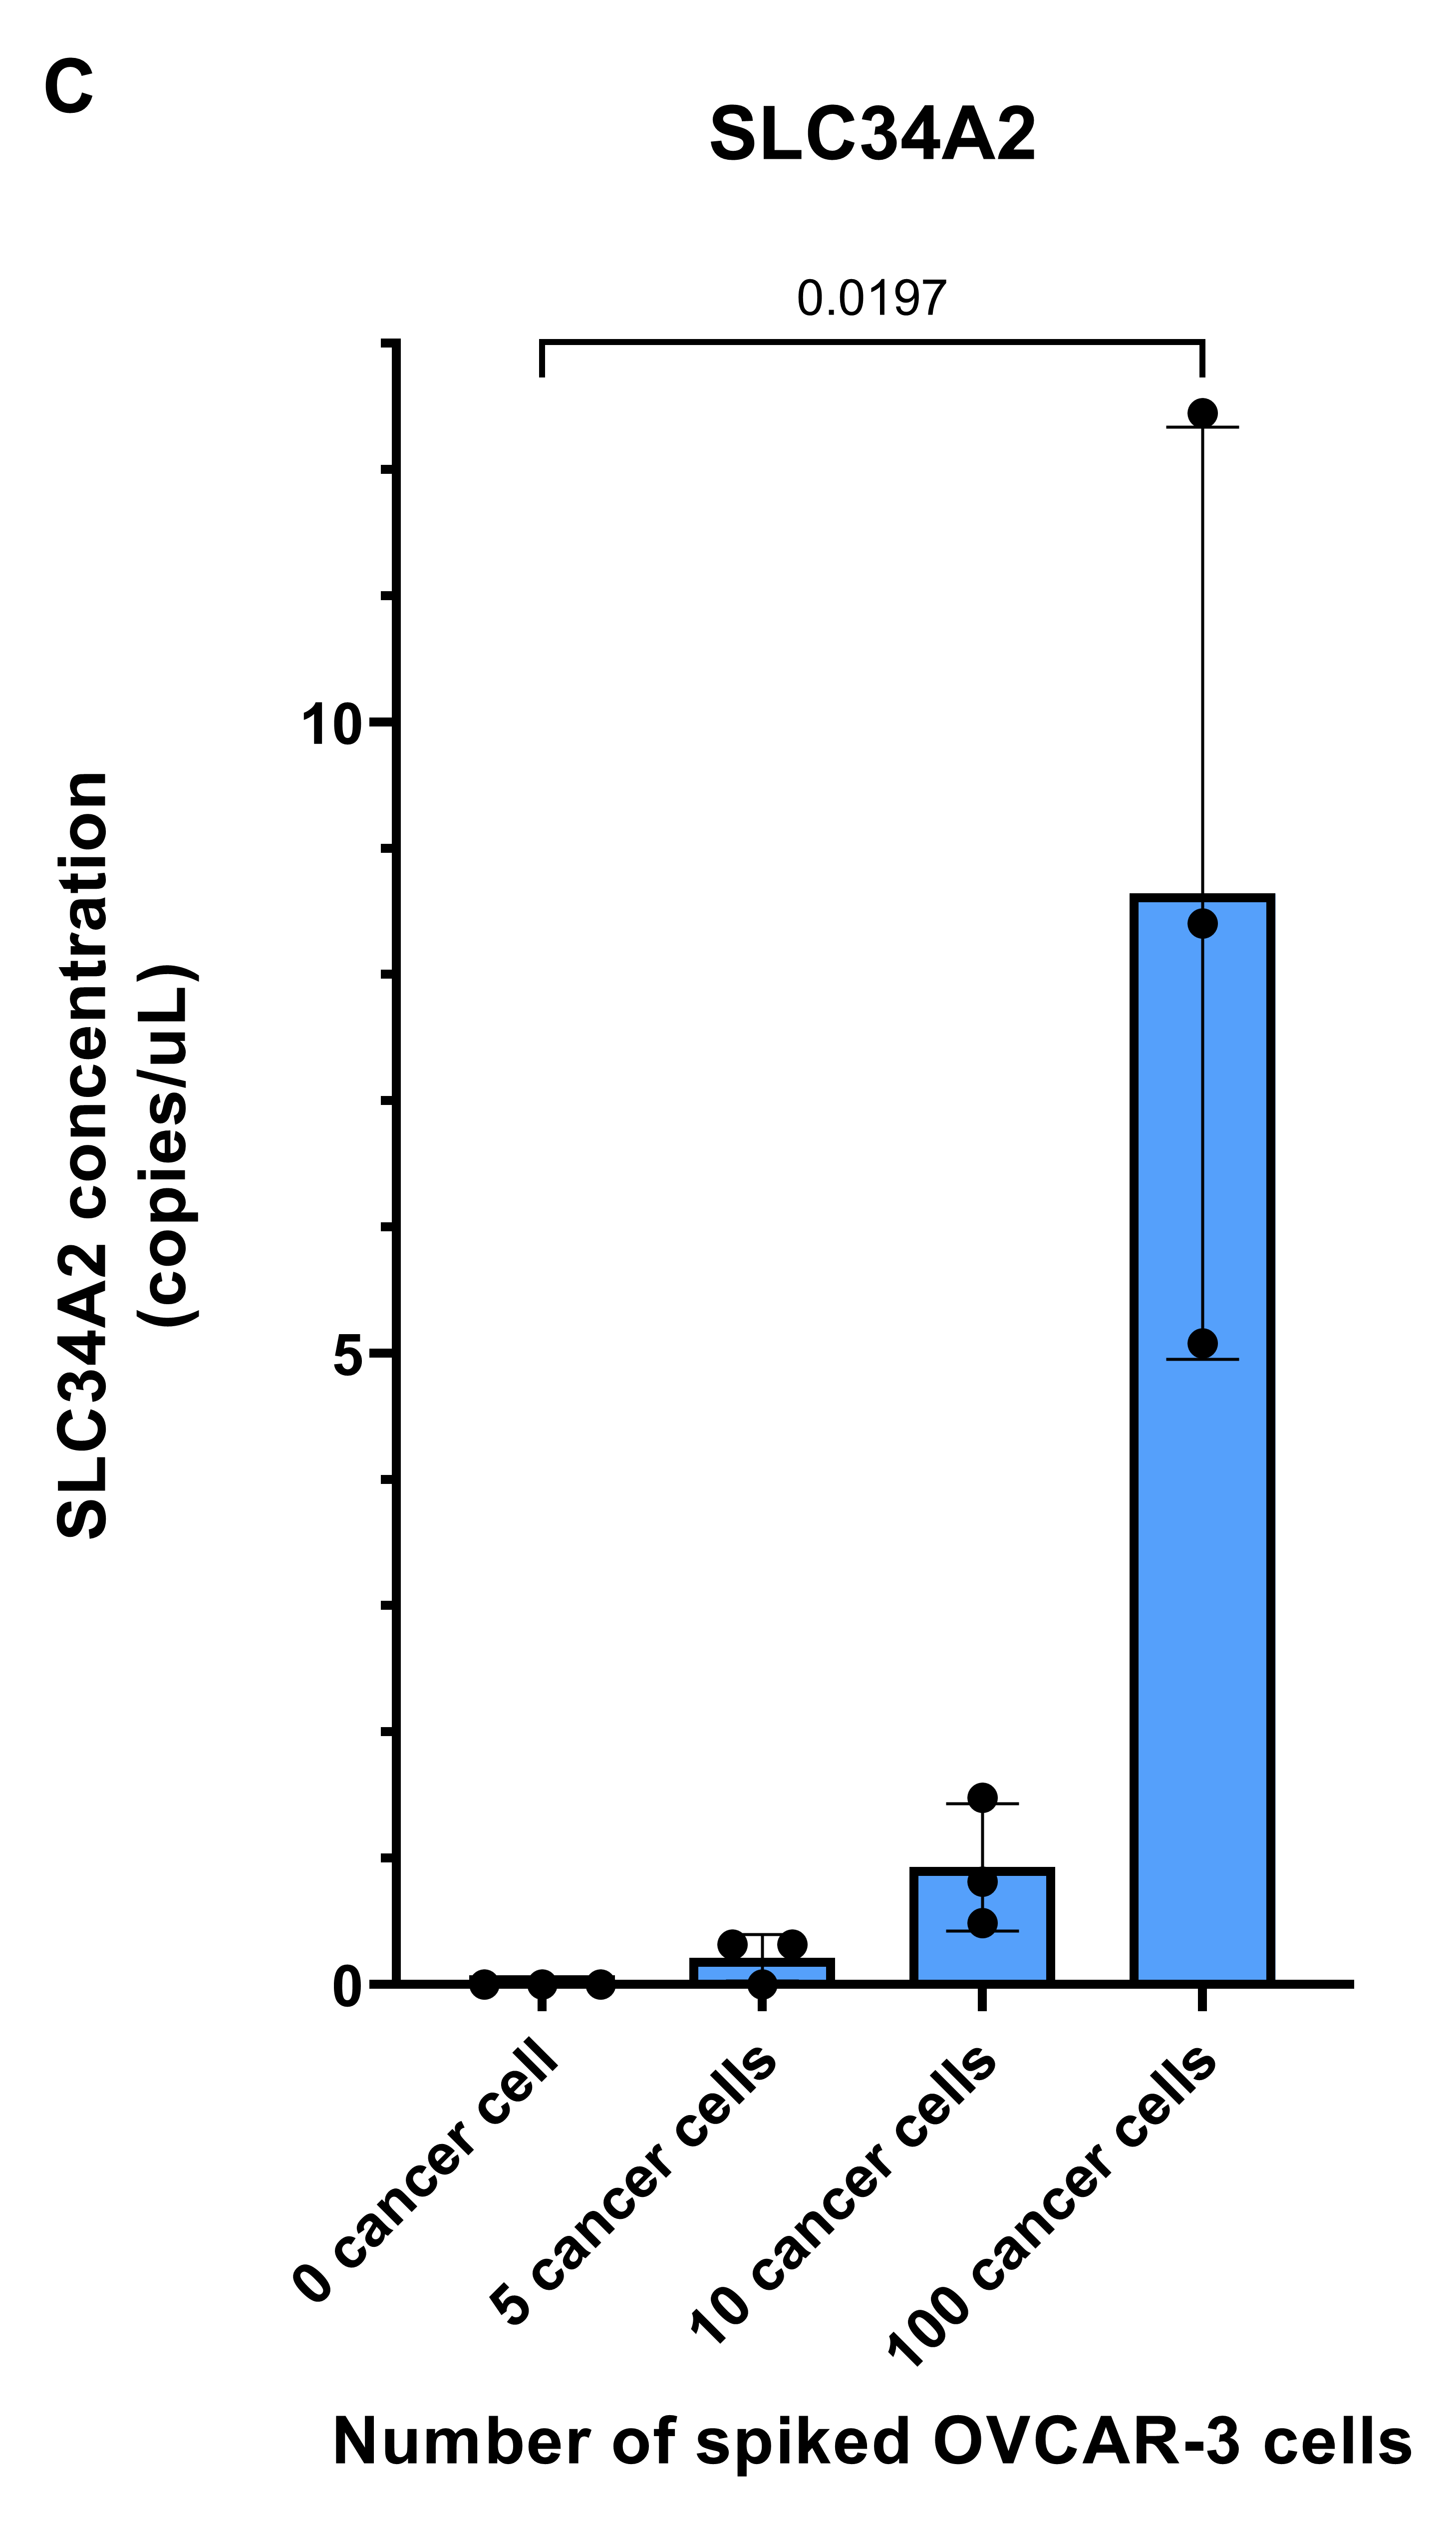

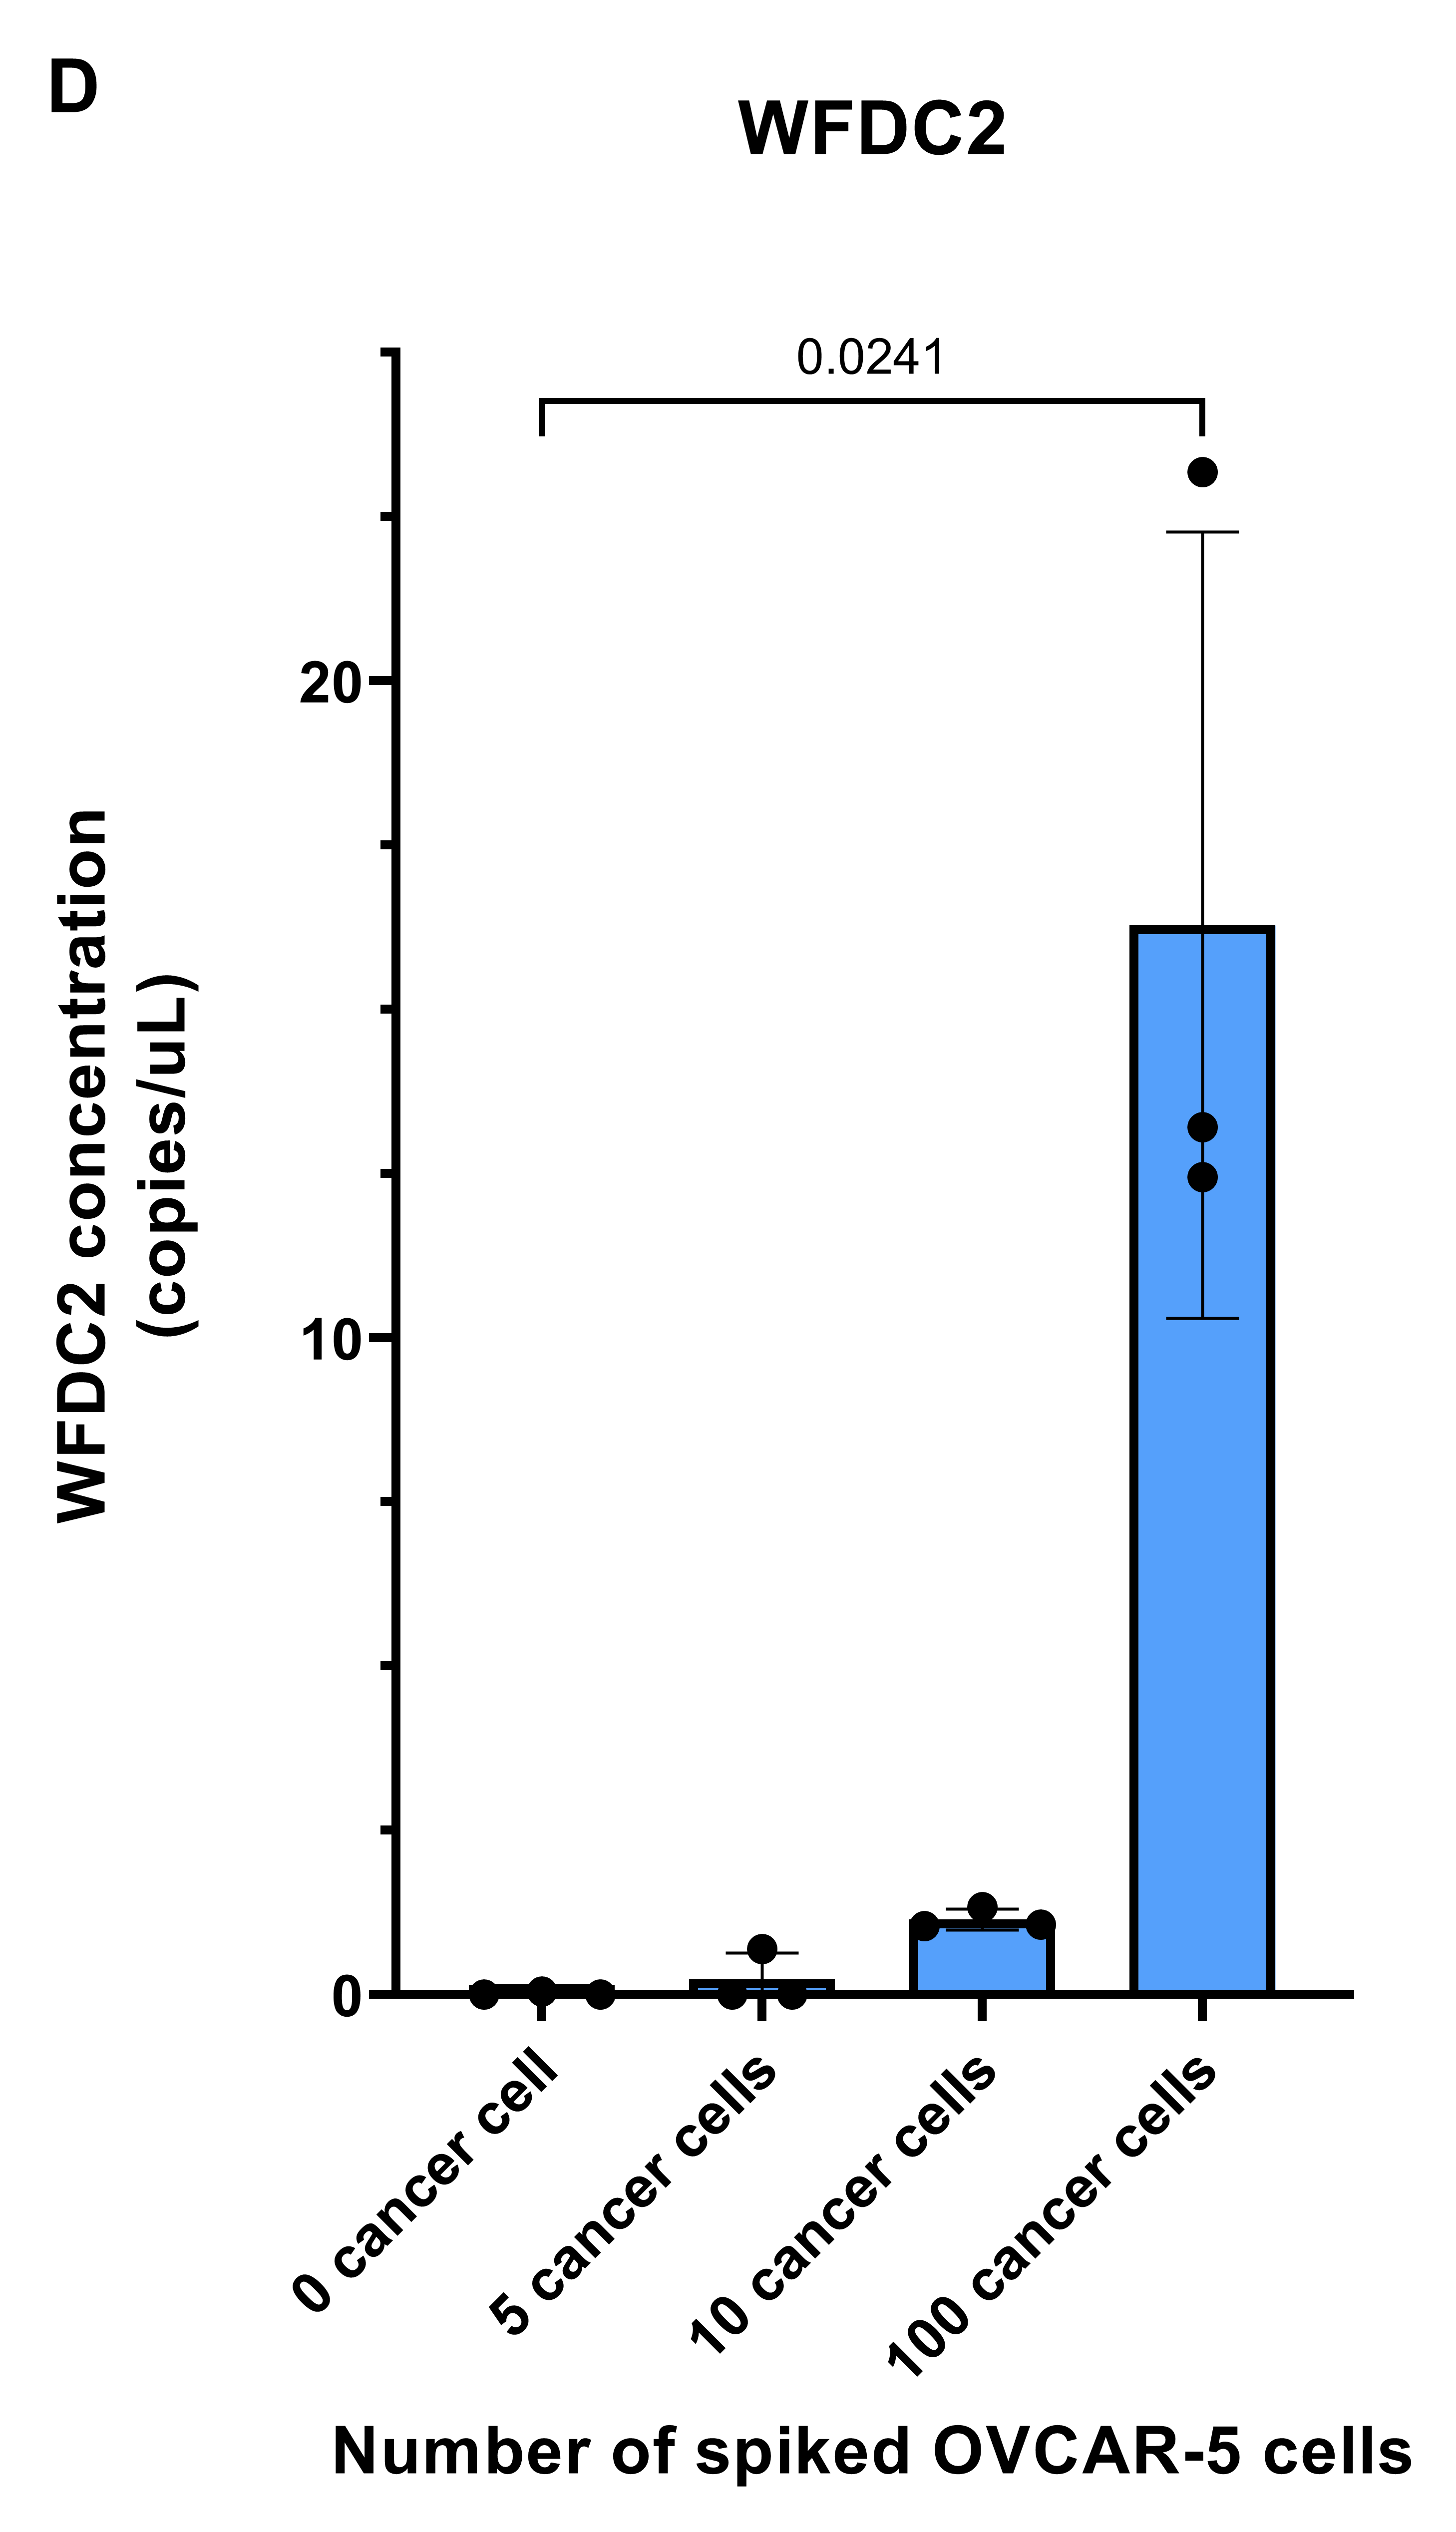


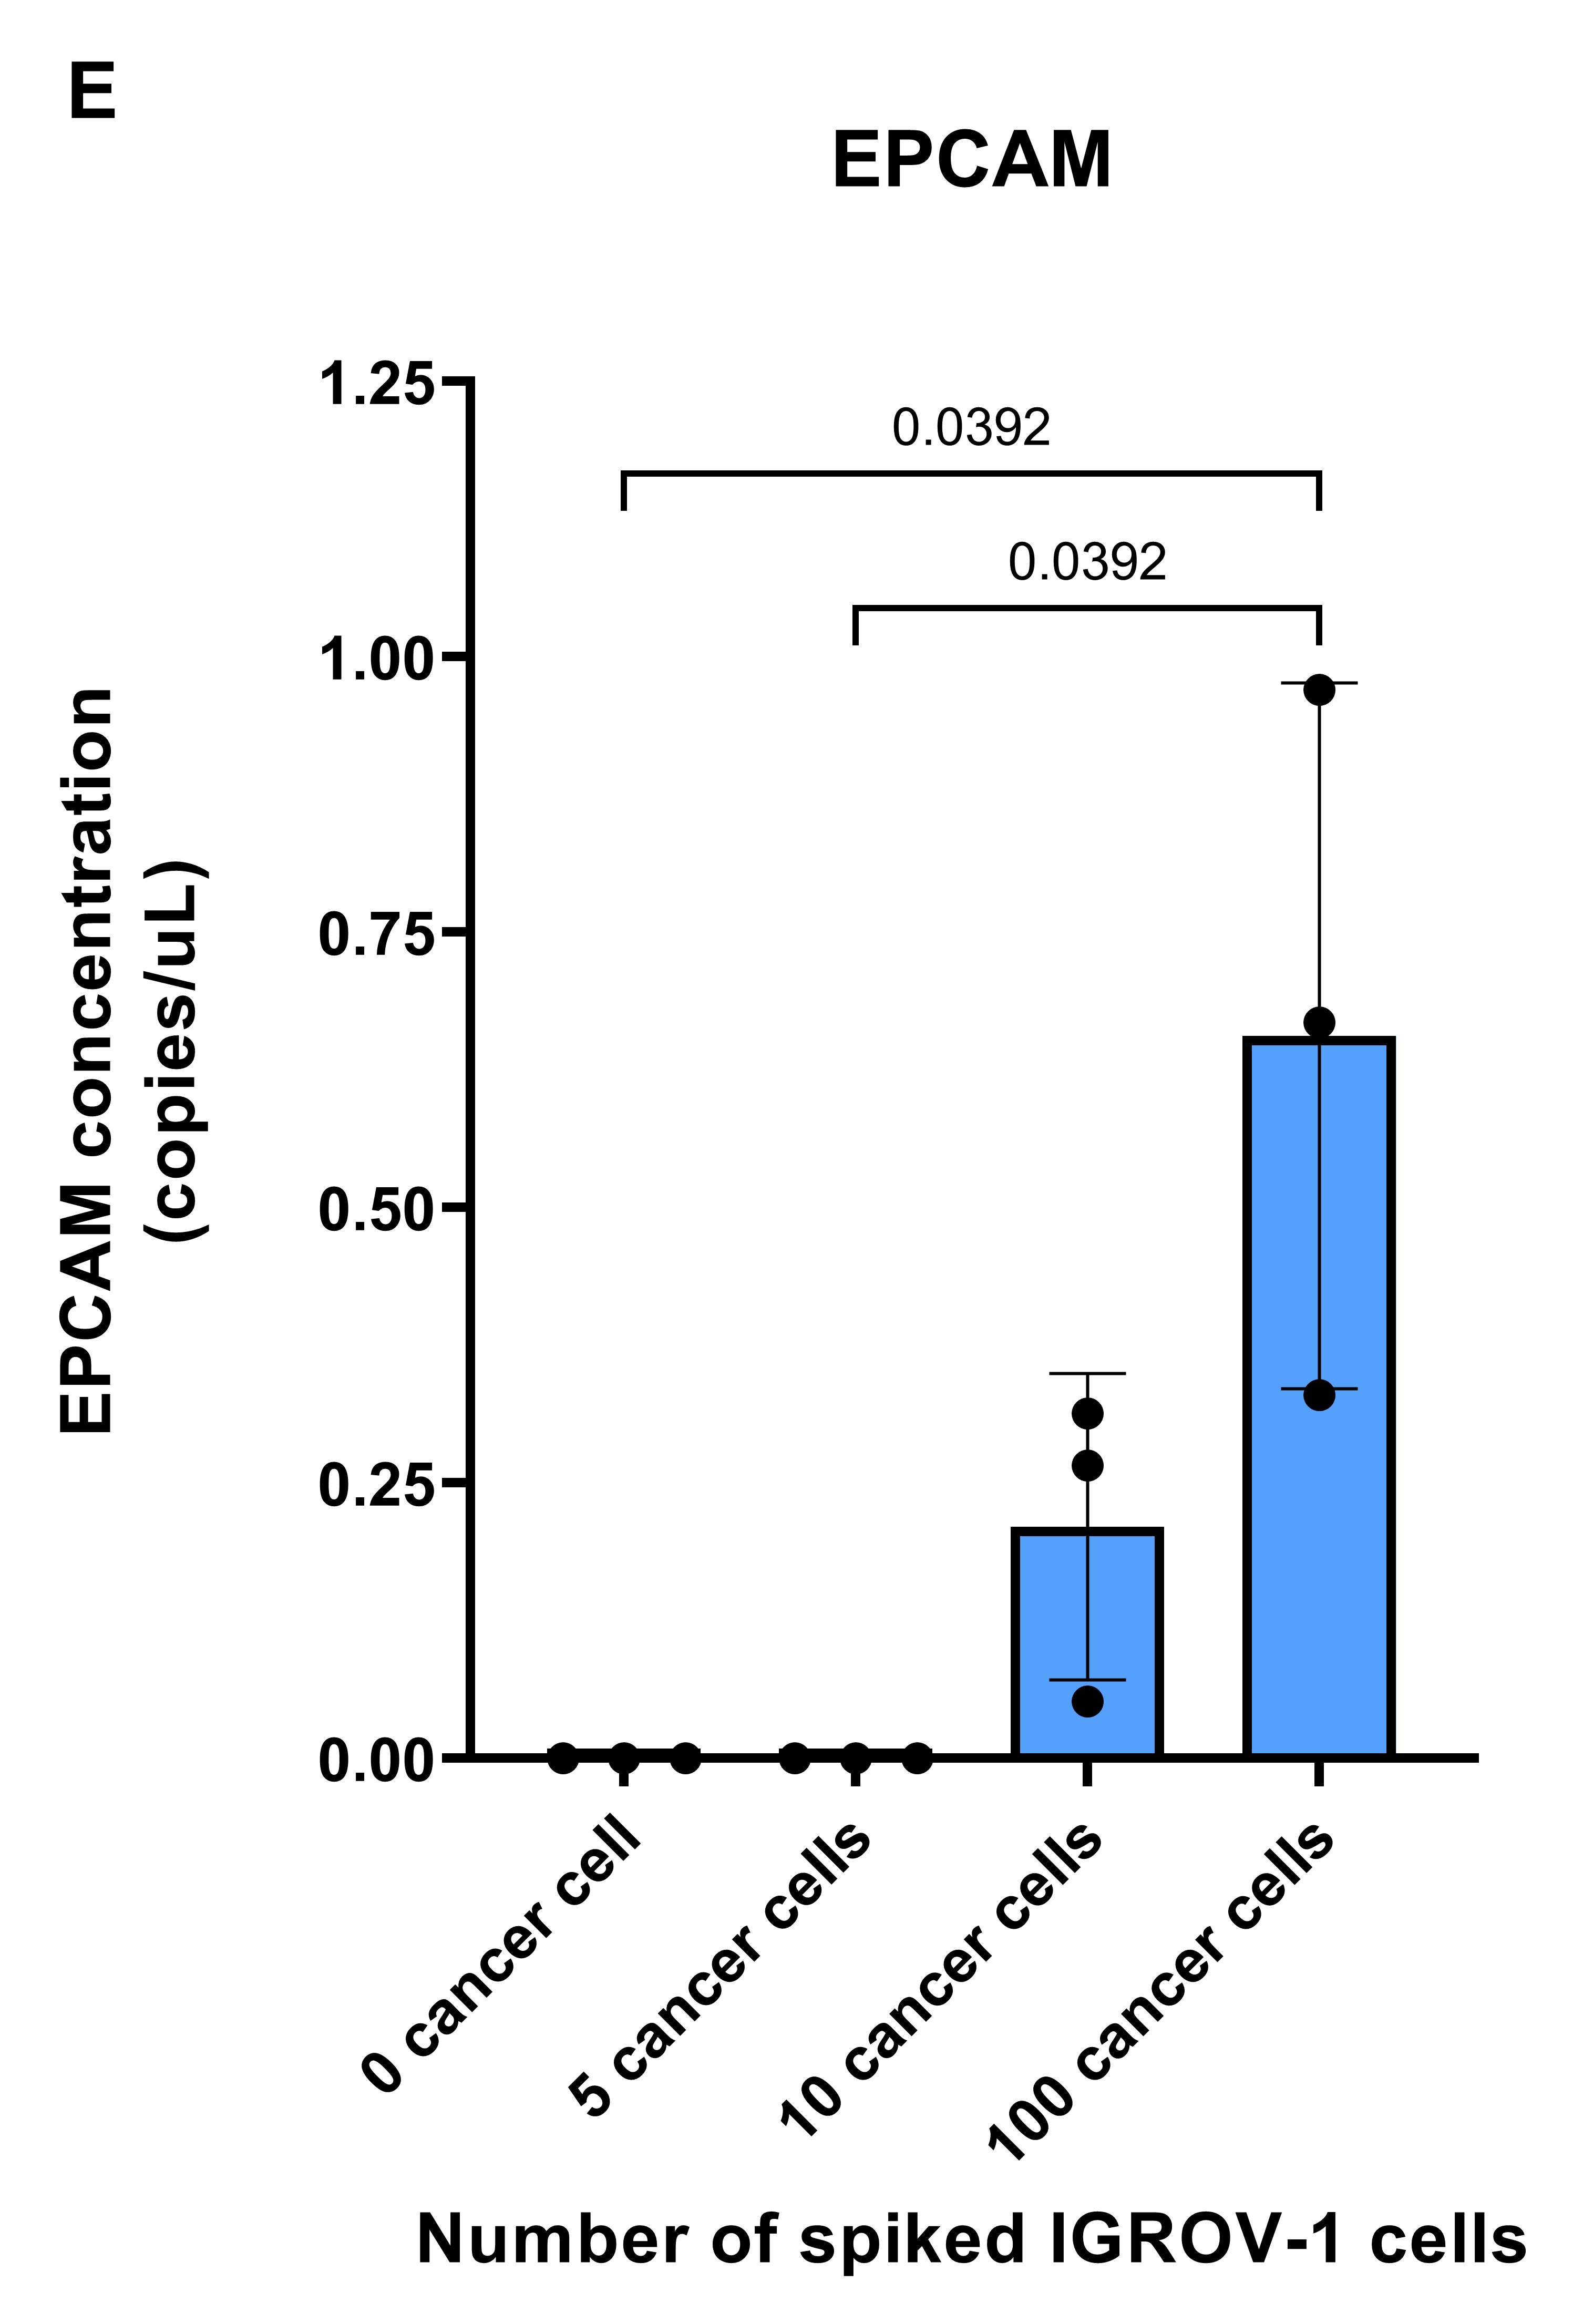

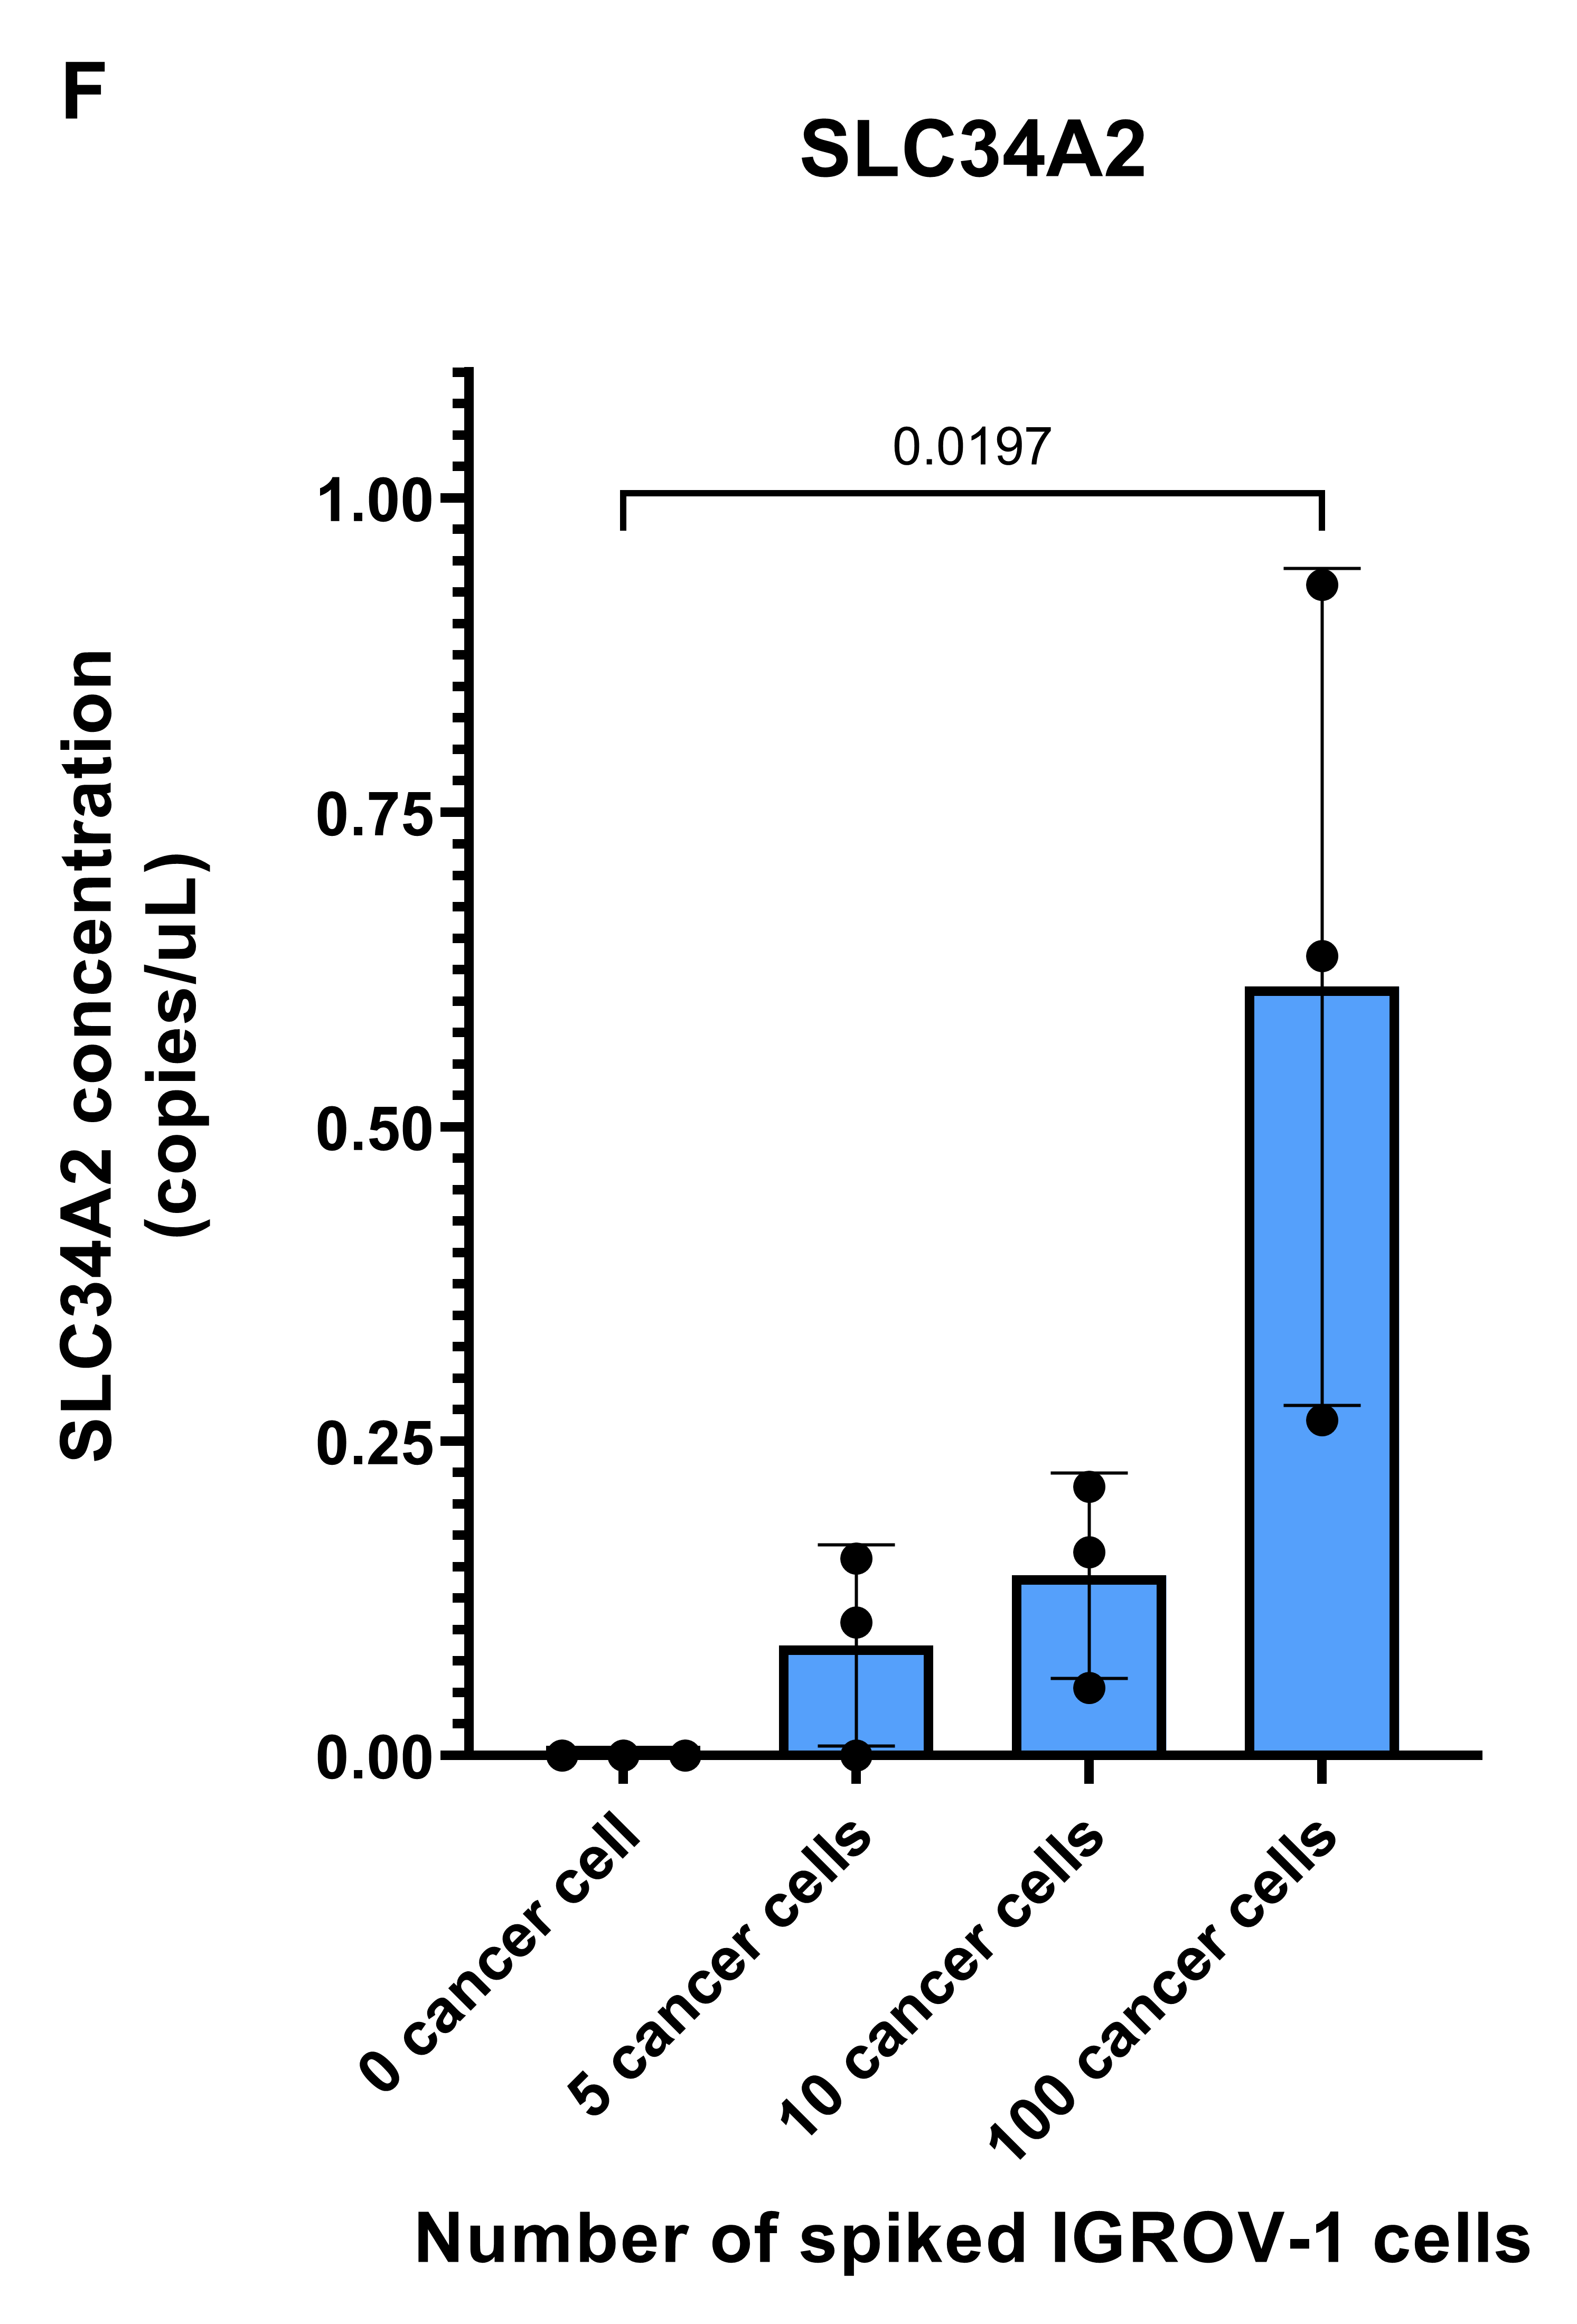


**Supplementary Information 4** Spiking experiment results. **Absolute gene expression levels in healthy female donor blood samples spiked with OVCAR-3 (A, B, C), OVCAR-5 (D), and IGROV-1 (E, F) tumor cells.** The counted 0/5/10/100 cells were spiked into 3 mL of healthy donors’ blood. CTC enrichment protocol was operated by a fully automatic CD-PRIME device and FAST-Auto disc. RNA was extracted from membrane-captured cells. Gene expression studies with *EPCAM* (A, E), *MUC16* (B), *SLC34A2* (C, F), and *WFDC2* (D) were performed on nanoplate-based digital PCR by absolute quantification. Bars represent mean values of absolute concentration (copies/μL), dots show individual values, error bars represent standard deviation (SD). N=3, significance tested by Kruskal-Wallis test and the post hoc Dunn's multiple comparisons test, p * < 0.05.
